# Supplementary material for: Malnutrition in type 2 diabetic patients does not affect healing of foot ulcers
Source: Springer Nature journal article supplement (doi:10.1007/s00592-018-1233-9), 2018-10-03
Supplement: MOESM1 [file 16169840]

**Appendix 1:**

1. **Malnutrition criteria according to HAS 2003 and 2007**

Patients younger than 70 years:

- Weight loss ≥ 5 % in a month or ≥ 10% in 6 months

- BMI < 17 kg/m2

- No inflammatory status (defined as the absence of concomitant elevation of CRP > 15 mg/l and of haptoglobin > 2.5 g/l), serum albumin < 30 g/l, prealbumin < 110 mg/l).

Patients older than 70 years:

- Weight loss ≥ 5% in a month, or ≥ 10 % in 6 months

- BMI < 21 kg/m2

- Global MNA < 17

- No inflammatory status (defined as the absence of concomitant elevation of CRP > 15 mg/l and of haptoglobin > 2.5 g/l), serum albumin < 30 g/l, prealbumin < 110 mg/l).

1. **Severe malnutrition criteria according to HAS 2003 and 2007**

Patients younger than 70 years:

- Weight loss ≥ 15% in 6 months or ≥ 10% in a month

- No inflammatory status (defined as the absence of concomitant elevation of CRP > 15 mg/l and of haptoglobin > 2.5 g/l), serum albumin < 20 g/l, prealbumin< 50 mg/l).

Patients older than 70 years:

- Weight loss ≥ 15 % in 6 months, or ≥ 10 % in a month

- BMI < 18 kg/m2

- No inflammatory status (defined as the absence of concomitant elevation of CRP > 15 mg/l and of haptoglobin > 2.5 g/l), serum albumin < 20 g/l, prealbumin< 50 mg/l).

1. **Nutritional management in case of malnutrition according to HAS 2007**

|  | | **Nutritional status** | | |
| --- | --- | --- | --- | --- |
| Normal | Malnutrition | Severe malnutrition |
| **Spontaneous nutritional intakes** | Normal | - Monitoring | - Nutritional advice - Enriched diet - Revaluation at 1 month | - Nutritional advice - Enriched diet + Oral nutritional supplementation - Revaluation at 2 weeks |
| Decreased but more than 50% of regular nutritional intakes | - Nutritional advice - Enriched diet - Revaluation at 1 month | - Nutritional advice - Enriched diet - Revaluation at 2 weeks and if failure = oral nutritional supplementation | - Nutritional advice - Enriched diet + Oral nutritional supplementation - Revaluation at 1 week and if failure= enteral nutrition |
| Decreased and less than 50% of regular nutritional intakes | - Nutritional advice - Enriched diet - Revaluation at 1 week and if failure = oral nutritional supplementation | - Nutritional advice - Enriched diet + Oral nutritional supplementation - Revaluation at 1 week and if failure = enteral nutrition | - Nutritional advice - Enriched diet + enteral nutrition - Revaluation at 1 week |
